# Supplementary material for: Disruption of ureide degradation affects plant growth and development during and after transition from vegetative to reproductive stages
Source: PubMed Central journal article supplement (PMC6245725; doi:10.1186/s12870-018-1491-2), 2018-11-20

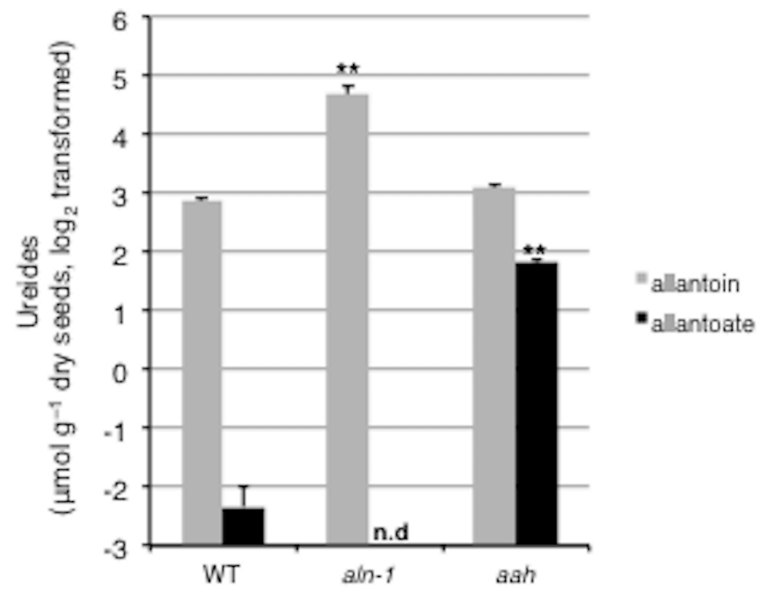

Supplement: 12870_2018_1491_MOESM6_ESM.pdf [file 12870_2018_1491_MOESM6_ESM.pdf]
